# Supplementary material for: Predictors of person-centered maternity care: the role of socioeconomic status, empowerment, and facility type
Source: Springer Nature journal article supplement (doi:10.1186/s12913-018-3183-x), 2018-05-11
Supplement: MOESM2 [file 15757062]

**Empowerment questions**

| Question                                                                                                                                                                                                                                                                                                                                                                                                                                                                                                                                                                                  | Response options                                                                                                                                                | comment                                           |
|-------------------------------------------------------------------------------------------------------------------------------------------------------------------------------------------------------------------------------------------------------------------------------------------------------------------------------------------------------------------------------------------------------------------------------------------------------------------------------------------------------------------------------------------------------------------------------------------|-----------------------------------------------------------------------------------------------------------------------------------------------------------------|---------------------------------------------------|
| <p><b>EMPOWERMENT</b></p> <p>Before we end, I would like to ask you questions about some other important aspects of a woman's life. I know that some of these questions are very personal. However, your answers are crucial for helping to understand the condition of women in Kenya. Let me assure you that your answers are completely confidential and will not be told to anyone and no one else will know that you were asked these questions.</p> <p>Household decision making:<br/>First I am going to ask you some questions about how decisions are made in your household</p> |                                                                                                                                                                 |                                                   |
| <p>Who usually decides how the money you earn will be used: mainly you, mainly your husband/partner, or you and your husband/partner jointly?</p>                                                                                                                                                                                                                                                                                                                                                                                                                                         | <p>1, 1 Respondent  <br/>2, 2 Husband/Partner  <br/>3, 3 Respondent And Husband/Partner Jointly  <br/>6, 6 Other</p>                                            | <p>(Use partner if respondent is not married)</p> |
| <p>Would you say that the money that you earn is more than what your husband/partner earns, less than what he earns, or about the same?</p>                                                                                                                                                                                                                                                                                                                                                                                                                                               | <p>1, 1 More Than Him  <br/>2, 2 Less Than Him  <br/>3, 3 About The Same  <br/>4, 4 Husband/Partner Doesn't Bring In Any Money  <br/>8, 8 Don'tknow</p>         |                                                   |
| <p>Who usually decides how your husband's/partner's earnings will be used: you, your husband/partner, or you and your husband/partner jointly?</p>                                                                                                                                                                                                                                                                                                                                                                                                                                        | <p>1, 1 Respondent  <br/>2, 2 Husband/Partner  <br/>3, 3 Respondent And Husband/Partner Jointly  <br/>4, 4 Husband/Partner Has No Earnings  <br/>6, 6 Other</p> |                                                   |
| <p>Who usually makes decisions about health care for yourself: you, your husband/partner, you and your husband/partner jointly, or someone else?</p>                                                                                                                                                                                                                                                                                                                                                                                                                                      | <p>1, 1 Respondent  <br/>2, 2 Husband/Partner  <br/>3, 3 Respondent And Husband/Partner Jointly  <br/>4, 4 Someone Else</p>                                     |                                                   |
| <p>Who usually makes decisions about making major household purchases?</p>                                                                                                                                                                                                                                                                                                                                                                                                                                                                                                                | <p>1, 1 Respondent  <br/>2, 2 Husband/Partner  <br/>3, 3 Respondent And Husband/Partner Jointly  <br/>4, 4 Someone Else</p>                                     |                                                   |

|                                                                                                                                                                                |                                                                                                                   |  |
|--------------------------------------------------------------------------------------------------------------------------------------------------------------------------------|-------------------------------------------------------------------------------------------------------------------|--|
| Who usually makes decisions about making purchases for daily household needs?                                                                                                  | 1, 1 Respondent  <br>2, 2 Husband/Partner  <br>3, 3 Respondent And Husband/Partner Jointly  <br>4, 4 Someone Else |  |
| Who usually makes decisions about visits to your family or relatives?                                                                                                          | 1, 1 Respondent  <br>2, 2 Husband/Partner  <br>3, 3 Respondent And Husband/Partner Jointly  <br>4, 4 Someone Else |  |
| Who usually makes decisions about what food should be cooked each day?                                                                                                         | 1, 1 Respondent  <br>2, 2 Husband/Partner  <br>3, 3 Respondent And Husband/Partner Jointly  <br>4, 4 Someone Else |  |
| DO NOT ASK ALOUD.<br>PRESENCE OF OTHERS AT THIS POINT<br>(PRESENT AND LISTENING, PRESENT BUT NOT LISTENING, OR NOT PRESENT)                                                    | 0, 0 No one Present  <br>1, 1 Some one Present And Listening  <br>2, 2 Some one Present But Not Listening         |  |
| OBSERVE WHO IS PRESENT: DO NOT ASK ALOUD.                                                                                                                                      | 1, 1 Children <10  <br>2, 2 Husband  <br>3, 3 Other males  <br>4, 4 Other females                                 |  |
| Sometimes a husband is annoyed or angered by things that his wife does.<br>In your opinion, is a husband justified in hitting or beating his wife in the following situations: |                                                                                                                   |  |
| If she goes out without telling him?                                                                                                                                           | 0, 0 No  <br>1, 1 Yes  <br>8, 8 Don't know                                                                        |  |
| If she neglects the children?                                                                                                                                                  | 0, 0 No  <br>1, 1 Yes  <br>8, 8 Don't know                                                                        |  |
| If she argues with him?                                                                                                                                                        | 0, 0 No  <br>1, 1 Yes  <br>8, 8 Don't know                                                                        |  |
| If she refuses to have sex with him?                                                                                                                                           | 0, 0 No  <br>1, 1 Yes  <br>8, 8 Don't know                                                                        |  |
| If she burns the food?                                                                                                                                                         | 0, 0 No  <br>1, 1 Yes  <br>8, 8 Don't know                                                                        |  |

|                                                                                                                                                                                                                                                                                                                                                                                                                                                                                                                                                                                                                                           |                                                                                                                |                                                   |
|-------------------------------------------------------------------------------------------------------------------------------------------------------------------------------------------------------------------------------------------------------------------------------------------------------------------------------------------------------------------------------------------------------------------------------------------------------------------------------------------------------------------------------------------------------------------------------------------------------------------------------------------|----------------------------------------------------------------------------------------------------------------|---------------------------------------------------|
| <p>DOMESTIC VIOLENCE</p> <p>I am going to ask some more questions about your relationship with your (last) husband/partner. If we should come to any question that you do not want to answer, just let me know and we will go on to the next question. I know that some of these questions are very personal. However, your answers are crucial for helping to understand the condition of women in Kenya. Let me assure you that your answers are completely confidential and will not be told to anyone and no one else will know that you were asked these questions. These are the last set of questions, so we will be done soon</p> |                                                                                                                |                                                   |
| <p>Does (did) your (last) husband/partner ever:</p> <p>a) say or do something to humiliate you in front of others?</p>                                                                                                                                                                                                                                                                                                                                                                                                                                                                                                                    | <p>0, 0 No  <br/> 1, 1 Yes  <br/> 8, 8 Don't know  <br/> 9, 9 Refused</p>                                      | <p>(Use partner if respondent is not married)</p> |
| <p>How often did this happen during the last 12 months: often, only sometimes, or not at all?</p>                                                                                                                                                                                                                                                                                                                                                                                                                                                                                                                                         | <p>0, 0 Not at all  <br/> 1, 1 Only sometimes  <br/> 2, 2 Often  <br/> 8, 8 Don't know  <br/> 9, 9 Refused</p> |                                                   |
| <p>Does/Did he ever</p> <p>b) threaten to hurt or harm you or someone close to you?</p>                                                                                                                                                                                                                                                                                                                                                                                                                                                                                                                                                   | <p>0, 0 No  <br/> 1, 1 Yes  <br/> 8, 8 Don't know  <br/> 9, 9 Refused</p>                                      |                                                   |
| <p>How often did this happen during the last 12 months: often, only sometimes, or not at all?</p>                                                                                                                                                                                                                                                                                                                                                                                                                                                                                                                                         | <p>0, 0 Not at all  <br/> 1, 1 Only sometimes  <br/> 2, 2 Often  <br/> 8, 8 Don't know  <br/> 9, 9 Refused</p> |                                                   |
| <p>Does/Did he ever</p> <p>c) insult you or make you feel bad about yourself?</p>                                                                                                                                                                                                                                                                                                                                                                                                                                                                                                                                                         | <p>0, 0 No  <br/> 1, 1 Yes  <br/> 8, 8 Don't know  <br/> 9, 9 Refused</p>                                      |                                                   |

|                                                                                                                                               |                                                                                                 |  |
|-----------------------------------------------------------------------------------------------------------------------------------------------|-------------------------------------------------------------------------------------------------|--|
| How often did this happen during the last 12 months: often, only sometimes, or not at all?                                                    | 0, 0 Not at all  <br>1, 1 Only sometimes  <br>2, 2 Often  <br>8, 8 Don't know  <br>9, 9 Refused |  |
| (Does/did) your (last) husband/partner ever do any of the following things to you:<br><br>(a) Push you, shake you, or throw something at you? | 0, 0 No  <br>1, 1 Yes  <br>8, 8 Don't know  <br>9, 9 Refused                                    |  |
| How often did this happen during the last 12 months: often, only sometimes, or not at all?                                                    | 0, 0 Not at all  <br>1, 1 Only sometimes  <br>2, 2 Often  <br>8, 8 Don't know  <br>9, 9 Refused |  |
| Does/Did he ever<br><br>(b) Slap you?                                                                                                         | 0, 0 No  <br>1, 1 Yes  <br>8, 8 Don't know  <br>9, 9 Refused                                    |  |
| How often did this happen during the last 12 months: often, only sometimes, or not at all?                                                    | 0, 0 Not at all  <br>1, 1 Only sometimes  <br>2, 2 Often  <br>8, 8 Don't know  <br>9, 9 Refused |  |
| Does/Did he ever<br><br>(c) Twist your arm or pull your hair?                                                                                 | 0, 0 No  <br>1, 1 Yes  <br>8, 8 Don't know  <br>9, 9 Refused                                    |  |
| How often did this happen during the last 12 months: often, only sometimes, or not at all?                                                    | 0, 0 Not at all  <br>1, 1 Only sometimes  <br>2, 2 Often  <br>8, 8 Don't know  <br>9, 9 Refused |  |
| Does/Did he ever<br><br>(d) Punch you with his fist or with something that could hurt you?                                                    | 0, 0 No  <br>1, 1 Yes  <br>8, 8 Don't know  <br>9, 9 Refused                                    |  |
| How often did this happen during the last 12 months: often, only sometimes, or not at all?                                                    | 0, 0 Not at all  <br>1, 1 Only sometimes  <br>2, 2 Often  <br>8, 8 Don't know  <br>9, 9 Refused |  |

|                                                                                                        |                                                                                                 |  |
|--------------------------------------------------------------------------------------------------------|-------------------------------------------------------------------------------------------------|--|
| Does/Did he ever<br>(e) Kick you or drag you or beat you up?                                           | 0, 0 No  <br>1, 1 Yes  <br>8, 8 Don't know  <br>9, 9 Refused                                    |  |
| How often did this happen during the last 12 months: often, only sometimes, or not at all?             | 0, 0 Not at all  <br>1, 1 Only sometimes  <br>2, 2 Often  <br>8, 8 Don't know  <br>9, 9 Refused |  |
| (f) Try to choke you or burn you on purpose?                                                           | 0, 0 No  <br>1, 1 Yes  <br>8, 8 Don't know  <br>9, 9 Refused                                    |  |
| How often did this happen during the last 12 months: often, only sometimes, or not at all?             | 0, 0 Not at all  <br>1, 1 Only sometimes  <br>2, 2 Often  <br>8, 8 Don't know  <br>9, 9 Refused |  |
| Does/Did he ever<br>(g) Threaten or attack you with a knife, gun, or any other weapon?                 | 0, 0 No  <br>1, 1 Yes  <br>8, 8 Don't know  <br>9, 9 Refused                                    |  |
| How often did this happen during the last 12 months: often, only sometimes, or not at all?             | 0, 0 Not at all  <br>1, 1 Only sometimes  <br>2, 2 Often  <br>8, 8 Don't know  <br>9, 9 Refused |  |
| Does/Did he ever<br>(h) Physically force you to have sexual intercourse even when you did not want to? | 0, 0 No  <br>1, 1 Yes  <br>8, 8 Don't know  <br>9, 9 Refused                                    |  |
| How often did this happen during the last 12 months: often, only sometimes, or not at all?             | 0, 0 Not at all  <br>1, 1 Only sometimes  <br>2, 2 Often  <br>8, 8 Don't know  <br>9, 9 Refused |  |
| Does/Did he ever<br>(i) Force you to perform any sexual acts you did not want to?                      | 0, 0 No  <br>1, 1 Yes  <br>8, 8 Don't know  <br>9, 9 Refused                                    |  |
| How often did this happen during the last 12 months: often, only sometimes, or not at all?             | 0, 0 Not at all  <br>1, 1 Only sometimes  <br>2, 2 Often  <br>8, 8 Don't know  <br>9, 9 Refused |  |
